# Supplementary material for: Transcriptional analysis of highly syntenic regions between Medicago truncatula and Glycine max using tiling microarrays
Source: PubMed Central journal article supplement (PMC2397509; doi:10.1186/gb-2008-9-3-r57), 2008-03-19
Supplement: gb-2008-9-3-r57-S1.pdf [file gb-2008-9-3-r57-S1.pdf]

**Table S1.** Summary of predicted genes in the syntenic regions between *Medicago truncatula* and *Glycine max*.

| Species      | Matrix <sup>a</sup> | Gene Number | Average Gene Length <sup>b</sup> | Exon Number | Average Exon Length <sup>b</sup> | Average Intron Length <sup>b</sup> | Total Exon Length <sup>b</sup> |
|--------------|---------------------|-------------|----------------------------------|-------------|----------------------------------|------------------------------------|--------------------------------|
| Barrel medic | Legume              | 229         | 897                              | 829         | 248                              | 396                                | 205,592                        |
|              | Dicot               | 153         | 1216                             | 714         | 261                              | 359                                | 186,354                        |
| Soybean      | Legume              | 217         | 975                              | 818         | 259                              | 417                                | 211,862                        |
|              | Dicot               | 156         | 1254                             | 702         | 279                              | 386                                | 195,858                        |

<sup>a</sup> Organism selected when use FGENESH.

<sup>b</sup> In bases.
