# Supplementary material for: Transcriptional analysis of highly syntenic regions between Medicago truncatula and Glycine max using tiling microarrays
Source: PubMed Central journal article supplement (PMC2397509; doi:10.1186/gb-2008-9-3-r57), 2008-03-19
Supplement: gb-2008-9-3-r57-S2.pdf [file gb-2008-9-3-r57-S2.pdf]

**Table S2.** *Medicago truncatula* genes preferentially expressed in the nodule.

| Gene   | Strand | $v_{\text{Nodule}}$ | $v_{\text{Root}}$ | $v_{\text{Stem}}$ | $v_{\text{Leaf}}$ | $v_{\text{Flower}}$ | $v_{\text{Seed}}$ | $p = 0.001$ | Collinear | Unigene Match                          |
|--------|--------|---------------------|-------------------|-------------------|-------------------|---------------------|-------------------|-------------|-----------|----------------------------------------|
| Mt_6   | -      | 0.36                | 0.25              | -0.07             | 0.07              | -0.18               | -0.16             | 0.23        | Gm_24     | EST649123 KV3 and cDNA clone KV3-53I24 |
| Mt_17  | -      | 0.32                | 0.02              | 0.07              | -0.02             | -0.11               | -0.07             | 0.14        | /         | cDNA clone MHRP-17G5                   |
| Mt_95  | +      | 0.32                | 0.13              | 0.02              | -0.02             | -0.05               | -0.06             | 0.29        | /         | No                                     |
| Mt_138 | -      | 0.28                | -0.01             | 0.01              | 0.05              | -0.09               | -0.08             | 0.15        | /         | No                                     |
| Mt_139 | -      | 0.22                | 0.03              | 0.02              | -0.02             | -0.17               | -0.13             | 0.2         | /         | No                                     |
| Mt_140 | -      | 0.28                | -0.01             | 0.01              | 0.05              | -0.09               | -0.08             | 0.15        | /         | No                                     |
| Mt_176 | -      | 2.95                | 0.01              | -0.01             | 0.16              | -0.42               | -0.68             | 2.21        | /         | No                                     |
| Mt_184 | +      | 0.36                | -0.03             | 0.06              | 0.03              | -0.19               | -0.14             | 0.18        | /         | No                                     |
| Mt_185 | +      | 0.36                | -0.03             | 0.09              | 0.03              | -0.18               | -0.19             | 0.15        | /         | EST397679 KV0 and cDNA clone pKV0-20E5 |
| Mt_196 | -      | 0.38                | -0.04             | 0.06              | 0.04              | -0.19               | -0.16             | 0.18        | /         | No                                     |
| Mt_197 | +      | 0.64                | 0.1               | 0.05              | -0.05             | -0.13               | -0.09             | 0.28        | /         | No                                     |
