# Supplementary material for: Transcriptional analysis of highly syntenic regions between Medicago truncatula and Glycine max using tiling microarrays
Source: PubMed Central journal article supplement (PMC2397509; doi:10.1186/gb-2008-9-3-r57), 2008-03-19
Supplement: gb-2008-9-3-r57-S3.pdf [file gb-2008-9-3-r57-S3.pdf]

**Table S3.** *Glycine max* genes preferentially expressed in the nodule.

| Gene   | Strand | $v$ _Nodule | $v$ _Root | $v$ _Stem | $v$ _Leaf | $v$ _Flower | $v$ _Seed | $p = 0.001$ | Collinear | Unigene Match                                                        |
|--------|--------|-------------|-----------|-----------|-----------|-------------|-----------|-------------|-----------|----------------------------------------------------------------------|
| Gm_9   | -      | 0.36        | -0.32     | -0.08     | -0.01     | 0.18        | 0.01      | 0.24        | /         | cDNA clone Gm-c1027-604,<br>HYPOTHETICAL OXIDOREDUCTASE              |
| Gm_24  | +      | 1.06        | -0.37     | -0.13     | 0.3       | 0.13        | -0.42     | 0.33        | Mt_6      | TGACG-motif binding protein (STGA1)                                  |
| Gm_26  | -      | 0.2         | -0.11     | 0.02      | 0.09      | -0.02       | -0.02     | 0.15        | /         | cDNA clone Gm-r1083-1994                                             |
| Gm_67  | +      | 0.97        | -0.24     | -0.15     | 0.43      | 0.15        | -0.16     | 0.19        | Mt_88     | cDNA clone Gm-r1083-3116                                             |
| Gm_95  | -      | 0.56        | -0.18     | -0.11     | -0.01     | 0.01        | 0.01      | 0.24        | /         | cDNA clone Gm-c1036-11538, AMIDASE-<br>LIKE PROTEIN                  |
| Gm_108 | +      | 0.55        | -0.28     | 0.28      | -0.61     | 0.31        | -0.44     | 0.39        | /         | Brassinosteroid-regulated protein mRNA                               |
| Gm_118 | -      | 0.19        | -0.25     | -0.05     | 0.02      | -0.02       | 0.08      | 0.16        | Mt_179    | Aspartokinase-homoserine dehydrogenase<br>(AK-HSDH)                  |
| Gm_121 | +      | 1.84        | -0.44     | -0.13     | 0.03      | -0.03       | 0.51      | 0.35        | Mt_137    | Partial mRNA for selenium binding protein                            |
| Gm_127 | -      | 0.64        | -0.41     | -0.27     | 0.12      | 0.31        | -0.12     | 0.46        | Mt_135    | cDNA clone Gm-c1049-6968, PUTATIVE<br>MICROFIBRIL-ASSOCIATED PROTEIN |
| Gm_164 | -      | 0.59        | -0.24     | -0.21     | 0.2       | 0.26        | -0.2      | 0.46        | Mt_158    | No                                                                   |
